# Supplementary material for: Comparison of Methicillin-Resistant Staphylococcus aureus Isolates from Cellulitis and from Osteomyelitis in a Taiwan Hospital, 2016–2018
Source: PubMed Central journal article supplement (PMC6617150; doi:10.3390/jcm8060816), 2019-06-07
Supplement: jcm-08-00816-s001.pdf [file jcm-08-00816-s001.pdf]

## Supplementary Materials

**Table S1.** New *spa* types found in CL-MRSA isolates.

| <i>spa</i> type | SCC <i>mec</i> type | MLST | <i>spa</i> repeats                      | PVL      |
|-----------------|---------------------|------|-----------------------------------------|----------|
| txAA            | IV                  | ST8  | r11 r19 r72 r21 r17 r34 r24 r34 r22 r25 | positive |
| txAB            | IV                  | ST59 | r04 r20 r17 r20 r17 r25 r25 r34 r34     | positive |
| txAC            | IV                  | ST8  | r08 r21 r17 r13 r24 r34 r22 r25         | negative |

Abbreviations: CL: cellulitis; MRSA, methicillin-resistant *Staphylococcus aureus*; *spa*, staphylococcal protein A; SCC*mec*, staphylococcal cassette chromosome *mec*; MLST, multilocus sequence typing; ST, sequence type; PVL, Pantan-Valentine leucocidin.

**Table S2.** Genotypes of OM-MRSA isolates in PJIs and non-PJIs.

| MRSA isolates, no. (%)        |         | MRSA isolates, no. (%)         |          |
|-------------------------------|---------|--------------------------------|----------|
| PJIs (n=26)                   |         | non-PJIs (n=89)                |          |
| ST239-t037-SCC <i>mec</i> III | 9 (35%) | ST239-t037-SCC <i>mec</i> III  | 16 (18%) |
|                               |         | ST239-t037-SCC <i>mec</i> IV   | 2 (2%)   |
|                               |         | ST239-t037-SCC <i>mec</i> V    | 1 (1%)   |
| ST59-t437-SCC <i>mec</i> IV   | 3 (12%) | ST59-t437-SCC <i>mec</i> IV    | 12 (14%) |
| ST59-t437-SCC <i>mec</i> V    | 5 (19%) | ST59-t437-SCC <i>mec</i> V     | 7 (8%)   |
|                               |         | ST59-t441-SCC <i>mec</i> IV    | 2 (2%)   |
|                               |         | ST59-t441-SCC <i>mec</i> V     | 6 (7%)   |
|                               |         | ST59-t3485-SCC <i>mec</i> IV   | 1 (1%)   |
|                               |         | ST59-t8391-SCC <i>mec</i> V    | 1 (1%)   |
| ST8-t008- SCC <i>mec</i> IV   | 3 (12%) | ST8-t008- SCC <i>mec</i> IV    | 15 (17%) |
| ST8-t008- SCC <i>mec</i> V    | 2 (8%)  | ST8-t574- SCC <i>mec</i> IV    | 1 (1%)   |
| ST8-t441- SCC <i>mec</i> IV   | 1 (4%)  | ST8-t967- SCC <i>mec</i> IV    | 2 (2%)   |
| ST5-t002- SCC <i>mec</i> II   | 1 (4%)  | ST5-t002- SCC <i>mec</i> II    | 1 (1%)   |
|                               |         | ST5-t002- SCC <i>mec</i> IV    | 2 (2%)   |
| ST7-t091- SCC <i>mec</i> III  | 1 (4%)  |                                |          |
|                               |         | ST9-t899- SCC <i>mec</i> IV    | 2 (2%)   |
|                               |         | ST30-t019- SCC <i>mec</i> IV   | 2 (2%)   |
|                               |         | ST45-t026- SCC <i>mec</i> IV   | 1 (1%)   |
|                               |         | ST45-t1081- SCC <i>mec</i> IV  | 1 (1%)   |
|                               |         | ST45-t1081- SCC <i>mec</i> V   | 5 (6%)   |
|                               |         | ST188-t189- SCC <i>mec</i> IV  | 1 (1%)   |
|                               |         | ST188-t189- SCC <i>mec</i> V   | 1 (1%)   |
|                               |         | ST241-t037- SCC <i>mec</i> III | 1 (1%)   |
|                               |         | ST398-t571- SCC <i>mec</i> V   | 2 (2%)   |
| ST508-t015- SCC <i>mec</i> IV | 1 (4%)  | ST508-t015- SCC <i>mec</i> IV  | 1 (1%)   |
|                               |         | ST573-t345- SCC <i>mec</i> IV  | 2 (2%)   |
|                               |         | ST573-t3525- SCC <i>mec</i> IV | 1 (1%)   |

Abbreviations: OM, osteomyelitis; MRSA, methicillin-resistant *Staphylococcus aureus*; PJI, periprosthetic joint infections; ST, sequence type; SCC*mec*, staphylococcal cassette chromosome *mec*.

**Table S3.** Association between antibiotic resistance profiles and genotypes of OM-MRSA isolates from PJIs.

| Antibiotic    | MIC <sup>a</sup><br>(µg/mL) | MRSA isolates, no. (%) |                                   |                  |                  |                 |                  |                   |
|---------------|-----------------------------|------------------------|-----------------------------------|------------------|------------------|-----------------|------------------|-------------------|
|               |                             | ST8 (n=6)              |                                   |                  | ST59 (n=8)       |                 |                  | ST239 (n=9)       |
|               |                             | t008-IV<br>(n=4)       | non-t008-IV <sup>b</sup><br>(n=2) | [total]<br>(n=6) | t437-IV<br>(n=3) | t437-V<br>(n=5) | [total]<br>(n=8) | t037-III<br>(n=9) |
| Ciprofloxacin | (MIC ≥ 4)                   | 4 (100%)               | 0                                 | 4 (67%)          | 1 (33%)          | 1 (20%)         | 2 (25%)          | 9 (100%)          |
| Fusidic acid  | (MIC ≥ 1)                   | 1 (25%)                | 0                                 | 1 (17%)          | 0                | 2 (40%)         | 2 (25%)          | 1 (11%)           |
| Gentamicin    | (MIC ≥ 16)                  | 1 (25%)                | 0                                 | 1 (17%)          | 1 (33%)          | 2 (40%)         | 3 (38%)          | 9 (100%)          |
| Rifampicin    | (MIC ≥ 4)                   | 0                      | 0                                 | 0                | 0                | 0               | 0                | 0                 |
| TMP-SMX       | (MIC ≥ 4)                   | 0                      | 0                                 | 0                | 0                | 0               | 0                | 9 (100%)          |
| Vancomycin    | (MIC ≥ 2)                   | 0                      | 0                                 | 0                | 0                | 0               | 0                | 0                 |

<sup>a</sup> MIC values determined by E-test.

<sup>b</sup> non-t008-IV: t008-V (n=2)

Abbreviations: MIC, minimum inhibitory concentration; MRSA, methicillin-resistant *Staphylococcus aureus*; ST, sequence type;

TMP-SMX, trimethoprim-sulfamethoxazole.

**Table S4.** Association between antibiotic resistance profiles and genotypes of OM-MRSA isolates from non-PJIs.

| Antibiotic    | MIC <sup>a</sup><br>(µg/mL) | MRSA isolates, no. (%) |                                   |                   |                   |                 |                  |                 |                                             |                   |                    |                                    |                   |
|---------------|-----------------------------|------------------------|-----------------------------------|-------------------|-------------------|-----------------|------------------|-----------------|---------------------------------------------|-------------------|--------------------|------------------------------------|-------------------|
|               |                             | ST8 (n=18)             |                                   |                   | ST59 (n=29)       |                 |                  |                 |                                             |                   | ST239 (n=19)       |                                    |                   |
|               |                             | t008-IV<br>(n=15)      | non-t008-IV <sup>b</sup><br>(n=3) | [total]<br>(n=18) | t437-IV<br>(n=12) | t437-V<br>(n=7) | t441-IV<br>(n=2) | t441-V<br>(n=6) | non-t437/<br>non-t441 <sup>c</sup><br>(n=2) | [total]<br>(n=29) | t037-III<br>(n=16) | non-t037-III <sup>d</sup><br>(n=3) | [total]<br>(n=19) |
| Ciprofloxacin | (MIC ≥ 4)                   | 13 (87%)               | 3 (100%)                          | 16 (89%)          | 1 (8%)            | 0               | 1 (50%)          | 0               | 0                                           | 2 (7%)            | 16 (100%)          | 3 (100%)                           | 19 (100%)         |
| Fusidic acid  | (MIC ≥ 1)                   | 4 (27%)                | 0                                 | 4 (22%)           | 1 (8%)            | 0               | 0                | 2 (33%)         | 1 (50%)                                     | 4 (14%)           | 5 (31%)            | 3 (100%)                           | 8 (42%)           |
| Gentamicin    | (MIC ≥ 16)                  | 2 (13%)                | 1 (33%)                           | 3 (17%)           | 8 (67%)           | 3 (43%)         | 0                | 4 (67%)         | 0                                           | 15 (52%)          | 13 (81%)           | 3 (100%)                           | 16 (84%)          |
| Rifampicin    | (MIC ≥ 4)                   | 0                      | 0                                 | 0                 | 0                 | 0               | 0                | 0               | 0                                           | 0                 | 0                  | 0                                  | 0                 |
| TMP-SMX       | (MIC ≥ 4)                   | 0                      | 0                                 | 0                 | 0                 | 0               | 0                | 0               | 0                                           | 0                 | 16 (100%)          | 3 (100%)                           | 19 (100%)         |
| Vancomycin    | (MIC ≥ 2)                   | 0                      | 0                                 | 0                 | 0                 | 0               | 0                | 1 (17%)         | 0                                           | 1 (4%)            | 3 (19%)            | 1 (33%)                            | 4 (21%)           |

<sup>a</sup> MIC values determined by E-test.

<sup>b</sup> non-t008-IV: t574-IV (n=1) and t967-IV (n=2)

<sup>c</sup> non-t437/non-t441: t3485-IV (n=1) and t8391-V (n=1)

<sup>d</sup> non-t037-III: t037-IV (n=2) and t037-V (n=1)

Abbreviations: MIC, minimum inhibitory concentration; MRSA, methicillin-resistant *Staphylococcus aureus*; ST, sequence type; TMP-SMX, trimethoprim-sulfamethoxazole.
